# Supplementary material
Source: Springer Nature journal article supplement (https://www.springermedizin.de/resource/supplementary/12965_2003_3_MOESM6_ESM.pdf/9572854)

**A.**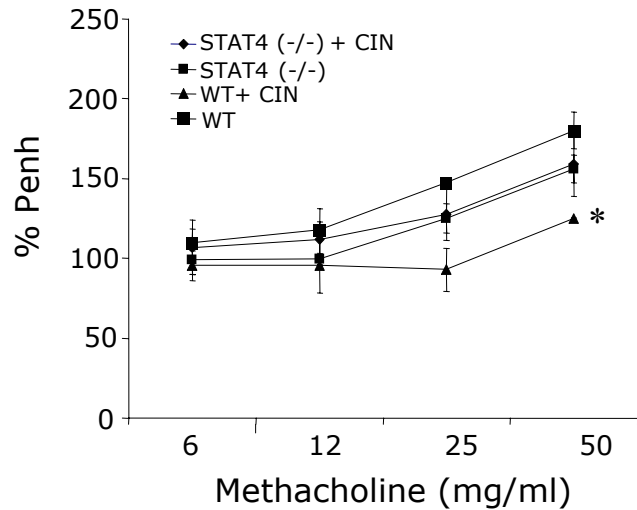**B.**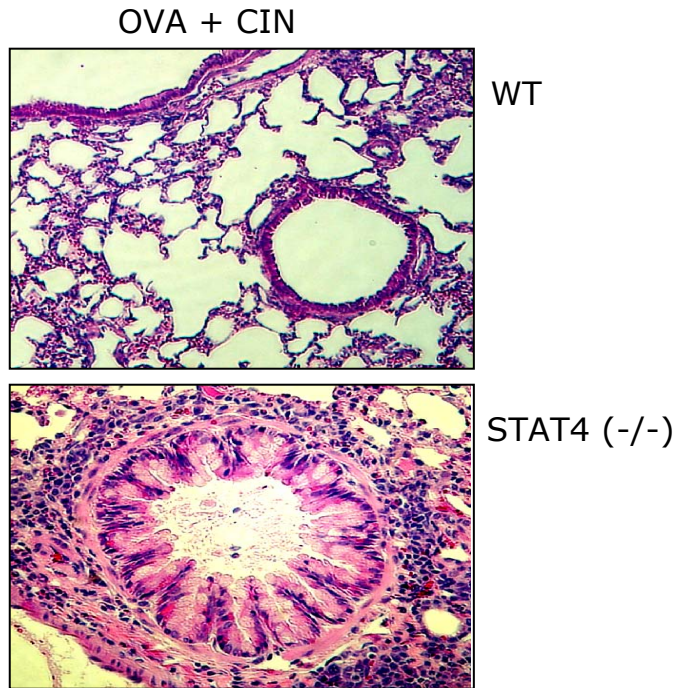

Supplement: MOESM6 [file 9572854]
